# Supplementary material for: Determination of styrene hydrogenation surface kinetics through detailed simulation of the hydrogen uptake curve
Source: Royal Society of Chemistry journal article supplement (doi:10.1039/c8re00132d), 2019-01-01
Supplement: c8re00132d1.pdf [file c8re00132d1.pdf]

## Nomenclature

|             |                                                                                               |
|-------------|-----------------------------------------------------------------------------------------------|
| C. I        | Confidence Intervals                                                                          |
| $C_b$       | Concentration in the averaged fluid, [ $mol/m^3 liquid$ ]                                     |
| $C_{cat}$   | Catalyst concentration, [ $g/L$ ]                                                             |
| $C_{EB,L}$  | Concentration of ethylbenzene in liquid phase, [ $mol/m^3 liquid$ ]                           |
| $C_{EB,S}$  | Concentration of ethylbenzene at the outer surface of catalyst particle, [ $mol/m^3 liquid$ ] |
| $C_i$       | Concentration at the interface, [ $mol/m^3 liquid$ ]                                          |
| $C_{H_2,i}$ | Concentration of hydrogen in gas-liquid interphase, [ $mol/m^3 liquid$ ]                      |
| $C_{H_2,L}$ | Concentration of hydrogen in liquid phase, [ $mol/m^3 liquid$ ]                               |
| $C_{H_2,S}$ | Concentration of hydrogen at the outer surface of catalyst particle, [ $mol/m^3 liquid$ ]     |
| $C_{St,L}$  | Concentration of styrene in liquid phase, [ $mol/m^3 liquid$ ]                                |
| $C_{St,S}$  | Concentration of styrene at the outer surface of catalyst particle, [ $mol/m^3 liquid$ ]      |
| $D$         | Molecular diffusion coefficient, [ $m^2/s$ ]                                                  |
| $F_{H_2}$   | Molar flow rate, [ $mol/s$ ]                                                                  |
| $F_{obj}$   | Objective function                                                                            |

|                                       |                                                                                                                                                                                                                                |
|---------------------------------------|--------------------------------------------------------------------------------------------------------------------------------------------------------------------------------------------------------------------------------|
| $H_E$                                 | Henry constant, [ $Pa \cdot m^3/mol$ ]                                                                                                                                                                                         |
| $k_i$                                 | observed mass transfer constant, [m/s]                                                                                                                                                                                         |
| $k_L$                                 | Specific gas-liquid mass transfer coefficient related to liquid side film, [m/s]                                                                                                                                               |
| $k_S$                                 | Specific liquid-solid mass transfer coefficient, [m/s]                                                                                                                                                                         |
| $K_{H_2}, K_{St},$<br>$K_{Eth}, K_I,$ | Chemisorption equilibrium constants of hydrogen, styrene, ethylbenzene and intermediate [ $m^3 liquid/mol$ ]                                                                                                                   |
| $k'_{obs}$                            | Observed rate constant for a competitive Langmuir-Hinshelwood reaction when styrene is in excess based on unit weight of catalyst particle (either pellet or fine particles), [ $\sqrt{mole \cdot m^3 liquid/g cat \cdot s}$ ] |
| $k'_1$                                | Intrinsic chemical reaction rate constant based on unit weight of catalyst, [ $mole/g cat \cdot s$ ]                                                                                                                           |
| $MTR$                                 | Mass transfer rate, [ $mol/m^3 liquid \cdot s$ ]                                                                                                                                                                               |
| $N$                                   | Stirrer speed, [rpm]                                                                                                                                                                                                           |
| $P$                                   | Pressure, [bar]                                                                                                                                                                                                                |
| $R$                                   | Gas constant, [ $m^3 \cdot bar/K \cdot mol$ ]                                                                                                                                                                                  |
| $r'$                                  | Reaction rate based on unit weight of catalyst, [ $mol/g cat \cdot s$ ]                                                                                                                                                        |
| $T$                                   | Temperature, [K]                                                                                                                                                                                                               |
| $t$                                   | Time, [s]                                                                                                                                                                                                                      |

|          |                                                          |
|----------|----------------------------------------------------------|
| $V_L$    | Volume of bulk liquid phase in the reactor, [ $m^3$ ]    |
| $V_{LS}$ | Volume of liquid associated with the catalyst, [ $m^3$ ] |
| $W_C$    | Catalyst weight, [g]                                     |

### Greek letters

|               |                                                                                                      |
|---------------|------------------------------------------------------------------------------------------------------|
| $\alpha_g$    | interfacial area available for mass transfer, [ $m^2/m^3 liquid$ ]                                   |
| $\alpha_s$    | Liquid-solid mass transfer area of stirred tank reactor per unit weight of catalyst, [ $m^2/g cat$ ] |
| $\varepsilon$ | Effectiveness factor, [-]                                                                            |
| $\theta$      | Fraction of active sites                                                                             |

### Subscripts

|       |                      |
|-------|----------------------|
| EB    | Ethylbenzene         |
| Exp   | Experimental         |
| G     | Gas                  |
| $H_2$ | Hydrogen             |
| $i$   | Gas-liquid interface |
| L     | Liquid phase         |
| S     | Solid phase          |
| Sim   | Simulated            |

|    |         |
|----|---------|
| St | Styrene |
|----|---------|
